# Supplementary material
Source: PubMed Central journal article supplement (PMC5873233)
Supplement: ba013698-suppl1.pdf [file ba013698-suppl1.pdf]

## Supplementary Appendix

**Table 1: Univariable Analysis of PFS and OS at 5 Years according to clinical variables in studied population**

| Variable                | PFS               |         | OS                |         |
|-------------------------|-------------------|---------|-------------------|---------|
|                         | HR (95% CI)       | P value | HR (95% CI)       | P value |
| SUV                     | 1.00 (0.95-1.06)  | 0.909   | 1.12 (1.04-1.21)  | 0.003   |
| SUV (<6 vs. ≥6)         | 1.32 (0.75-2.32)  | 0.344   | 2.35 (0.91-6.06)  | 0.078   |
| SUV (<10 vs. ≥10)       | 0.93 (0.37-2.34)  | 0.877   | 3.74 (1.32-10.59) | 0.013   |
| Site group              | 1.00 (0.94-1.07)  | 0.966   | 1.06 (0.96-1.16)  | 0.255   |
| Stage                   | 1.47 (1.20-1.79)  | 0.000   | 1.05 (0.76-1.46)  | 0.766   |
| Stage (I vs. II-IV)     | 2.78 (1.56-4.96)  | 0.001   | 1.64 (0.65-4.15)  | 0.298   |
| Stage (I-II vs. III-IV) | 2.82 (1.62-4.90)  | 0.000   | 0.90 (0.34-2.40)  | 0.828   |
| Age                     | 1.02 (0.99-1.04)  | 0.092   | 1.07 (1.02-1.11)  | 0.005   |
| Age (<60 vs. ≥60)       | 1.74 (0.97-3.13)  | 0.064   | 3.71 (1.07-12.91) | 0.039   |
| Age (<70 vs. ≥70)       | 2.00 (1.14-3.52)  | 0.016   | 3.07 (1.20-7.84)  | 0.019   |
| Gender                  | 1.03 (0.59-1.80)  | 0.916   | 0.54 (0.21-1.40)  | 0.206   |
| >1 involved site        | 2.48 (1.42-4.32)  | 0.001   | 1.93 (0.76-4.87)  | 0.164   |
| B symptom               | 2.26 (1.34-3.82)  | 0.002   | 1.67 (0.65-4.28)  | 0.285   |
| LDH                     | 1.91 (0.93-3.94)  | 0.079   | 1.46 (0.42-5.03)  | 0.553   |
| ECOG PS                 | 1.38 (0.85-2.26)  | 0.194   | 2.31 (1.10-5.07)  | 0.028   |
| BM involvement          | 1.09 (0.82-1.44)  | 0.564   | 1.22 (0.76-1.95)  | 0.419   |
| IPI                     | 1.71 (1.33-2.19)  | 0.000   | 1.33 (0.89-2.00)  | 0.167   |
| MALT-IPI                | 2.55 (1.74-3.75)  | 0.000   | 1.50 (0.82-2.75)  | 0.189   |
| LCT                     | 8.37 (3.93-17.80) | 0.000   | 4.11 (1.45-11.70) | 0.008   |

Abbreviations: SUV, standard uptake value; IPI, International Prognostic Index; ECOG, Eastern Cooperative Oncology Group; PS, performance Status; LDH, lactate dehydrogenase; BM, bone marrow; LCT, large cell transformation; PFS, progression free survival; OS, overall survival; HR, hazard ratio; CI, confidence interval.

**Table 2: Comparison between patients with different Ki-67 levels and FDG avidity**

|             | FDG       |           | P value | SUV       |           | P value |
|-------------|-----------|-----------|---------|-----------|-----------|---------|
|             | Negative  | Positive  |         | <10       | ≥10       |         |
| Ki-67 index |           |           |         |           |           |         |
| ≤15         | 16 (20.8) | 61 (79.2) | 0.548   | 67 (87.9) | 10 (13.0) | 0.435   |
| >15         | 4 (15.4)  | 22 (84.6) |         | 21 (80.8) | 5 (19.2)  |         |
| Ki-67 index |           |           |         |           |           |         |
| ≤20         | 16 (18.4) | 71 (81.6) | 0.539   | 76 (87.4) | 11 (12.6) | 0.198   |
| >20         | 4 (25.0)  | 12 (75.0) |         | 12 (75.0) | 4 (25.0)  |         |
| Ki-67 index |           |           |         |           |           |         |
| ≤30         | 17 (19.3) | 71 (80.7) | 0.951   | 77 (87.5) | 11 (12.5) | 0.151   |
| >30         | 3 (20.0)  | 12 (80.0) |         | 11 (73.3) | 4 (26.7)  |         |

Abbreviations: FDG, <sup>18</sup>F-Fluorodeoxyglucose; SUV, standard uptake value.
